# Supplementary material
Source: Springer Nature journal article supplement (https://www.springermedizin.de/resource/supplementary/12884_2011_460_MOESM1_ESM.pdf/9457934)
Supplement: MOESM1 [file 9457934]

2000 – 2008  
16661 - 18432

Spontaneous  
10730 – 12165  
64.4% - 66.0%  
+ 1.6

Vacuum extraction  
3625 – 3432  
21.8% - 18.6%  
-3.2

Forceps  
406 - 247  
2.4% - 1.3%  
-1.1

Elective CS  
503 – 626  
3.0% - 3.4%  
+ 0.4

Non-elective CS  
1392 – 1954  
8.4% - 10.6%  
+ 2.2
